# Supplementary material
Source: PubMed Central journal article supplement (PMC8489982)

**Association of novel measures of sleep disturbances with blood pressure: the Multi-Ethnic Study of Atherosclerosis**

John S. Kim, MD, MS, Ali Azarbarzin, PhD, Rui Wang, PhD, Ina E. Djonlagic, MD, Naresh M. Punjabi, MD, PhD, Phyllis C. Zee, MD, PhD, Brian B. Koo, MD, Elsayed Z. Soliman, MD, MS, Magdy Younes, MD, PhD, Susan S. Redline, MD, MPH

**Supplementary Appendix**

Table S1 Baseline characteristics by Overall Odds Ratio Product Quartiles

|                                             | Odds Ratio Product Quartiles |              |              |              |
|---------------------------------------------|------------------------------|--------------|--------------|--------------|
|                                             | 1                            | 2            | 3            | 4            |
| Participants, n                             | 455                          | 449          | 454          | 442          |
| Odds ratio product                          | 0.98 ± 0.12                  | 1.22 ± 0.05  | 1.41 ± 0.06  | 1.68 ± 0.13  |
| Age, years                                  | 67 ± 9                       | 69 ± 9       | 69 ± 9       | 70 ± 9       |
| Female, %                                   | 54%                          | 56%          | 53%          | 52%          |
| Race/ethnicity, %                           |                              |              |              |              |
| White                                       | 40%                          | 38%          | 37%          | 32%          |
| Asian                                       | 8%                           | 12%          | 13%          | 17%          |
| Black                                       | 25%                          | 25%          | 28%          | 30%          |
| Hispanic                                    | 27%                          | 25%          | 22%          | 21%          |
| Systolic blood pressure, mmHg <sup>‡</sup>  | 121.7 ± 19.5                 | 123.1 ± 20.7 | 122.9 ± 20.6 | 124.4 ± 20.1 |
| Diastolic blood pressure, mmHg <sup>‡</sup> | 68.2 ± 9.7                   | 68.3 ± 10.5  | 68.1 ± 9.5   | 68.5 ± 9.8   |
| Hypertension, %                             | 49%                          | 52%          | 54%          | 57%          |
| Height, cm                                  | 165.6 ± 10.1                 | 165.4 ± 10.0 | 165.5 ± 9.8  | 165.3 ± 10.3 |
| Waist, cm                                   | 99.6 ± 14.0                  | 98.7 ± 14.0  | 99.5 ± 14.6  | 99.1 ± 14.7  |
| Body mass index, kg/m <sup>2</sup>          | 29.2 ± 5.5                   | 28.3 ± 5.5   | 28.7 ± 5.7   | 28.3 ± 5.5   |
| Blood pressure medication use, %            | 49%                          | 52%          | 54%          | 57%          |
| Ever smoker, %                              | 52%                          | 51%          | 53%          | 53%          |
| Diabetes, %                                 | 20%                          | 17%          | 19%          | 21%          |
| Apnea-hypopnea index (AHI), events/hour     | 13.1 ± 15.2                  | 13.1 ± 14.4  | 15.1 ± 17.7  | 17.5 ± 18.0  |
| AHI < 5 events/hour, %                      | 38%                          | 35%          | 37%          | 28%          |
| 5 ≤ AHI < 15 events/hour, %                 | 33%                          | 34%          | 31%          | 29%          |
| AHI ≥ 15 events/hour, %                     | 29%                          | 31%          | 32%          | 43%          |

Data presented as mean ± standard deviation for continuous variables and (%) for categorical variables

<sup>‡</sup>Exam 5 blood pressure measurements unadjusted for medication use

Higher odds ratio product quartiles indicate lower sleep depth

Table S2 Baseline Characteristics by NREM Duty Cycle Quartiles

|                                             | NREM Duty Cycle Quartiles |              |              |              |
|---------------------------------------------|---------------------------|--------------|--------------|--------------|
|                                             | 1                         | 2            | 3            | 4            |
| Participants, n                             | 448                       | 506          | 481          | 413          |
| NREM Duty Cycle                             | 0.29 ± 0.03               | 0.35 ± 0.01  | 0.38 ± 0.01  | 0.44 ± 0.03  |
| Age, years                                  | 71 ± 9                    | 68 ± 9       | 69 ± 9       | 67 ± 9       |
| Female, %                                   | 53%                       | 56%          | 54%          | 48%          |
| Race/ethnicity, %                           |                           |              |              |              |
| White                                       | 36%                       | 36%          | 39%          | 34%          |
| Asian                                       | 11%                       | 12%          | 12%          | 16%          |
| Black                                       | 27%                       | 28%          | 26%          | 29%          |
| Hispanic                                    | 26%                       | 24%          | 23%          | 21%          |
| Systolic blood pressure, mmHg <sup>‡</sup>  | 126.2 ± 21.4              | 122.9 ± 20.1 | 122.2 ± 20.5 | 120.6 ± 18.5 |
| Diastolic blood pressure, mmHg <sup>‡</sup> | 68.0 ± 9.7                | 68.2 ± 9.7   | 68.3 ± 10.1  | 68.4 ± 9.9   |
| Hypertension, %                             | 62%                       | 53%          | 49%          | 48%          |
| Height, cm                                  | 165.1 ± 10.0              | 164.8 ± 10.0 | 165.0 ± 9.9  | 167.0 ± 10.1 |
| Waist, cm                                   | 102.7 ± 14.7              | 98.1 ± 14.9  | 98.0 ± 13.4  | 98.0 ± 13.3  |
| Body mass index, kg/m <sup>2</sup>          | 30.1 ± 6.1                | 28.2 ± 5.4   | 28.0 ± 5.1   | 28.1 ± 5.2   |
| Blood pressure medication use, %            | 63%                       | 54%          | 50%          | 48%          |
| Ever smoker, %                              | 55%                       | 52%          | 51%          | 51%          |
| Diabetes, %                                 | 23%                       | 17%          | 15%          | 23%          |
| Apnea-hypopnea index (AHI), events/hour     | 18.3 ± 18.9               | 13.2 ± 15.4  | 13.9 ± 16.2  | 13.2 ± 14.2  |
| AHI < 5 events/hour, %                      | 26%                       | 38%          | 37%          | 36%          |
| 5 ≤ AHI < 15 events/hour, %                 | 31%                       | 34%          | 31%          | 32%          |
| AHI ≥ 15 events/hour, %                     | 43%                       | 28%          | 32%          | 32%          |

Data presented as mean ± standard deviation for continuous variables and (%) for categorical variables

<sup>‡</sup>Exam 5 blood pressure measurements unadjusted for medication use

NREM = non-rapid eye movement

Table S3 Baseline Characteristics by Hypoxic Burden Quartiles

|                                             | Hypoxic Burden Quartiles |              |              |              |
|---------------------------------------------|--------------------------|--------------|--------------|--------------|
|                                             | 1                        | 2            | 3            | 4            |
| Participants, n                             | 506                      | 495          | 499          | 504          |
| Hypoxic Burden ((%·min)/hr)                 | 14.2 ± 14.0              | 31.4 ± 21.1  | 53.5 ± 27.1  | 126.3 ± 87.3 |
| Age, years                                  | 67 ± 9                   | 68 ± 9       | 69 ± 9       | 70 ± 9       |
| Female, %                                   | 70%                      | 57%          | 50%          | 36%          |
| Race/ethnicity, %                           |                          |              |              |              |
| White                                       | 34%                      | 41%          | 37%          | 33%          |
| Asian                                       | 12%                      | 13%          | 11%          | 14%          |
| Black                                       | 32%                      | 27%          | 27%          | 24%          |
| Hispanic                                    | 22%                      | 19%          | 25%          | 29%          |
| Systolic blood pressure, mmHg <sup>‡</sup>  | 121.2 ± 21.2             | 122.2 ± 20.6 | 123.5 ± 19.3 | 124.4 ± 19.6 |
| Diastolic blood pressure, mmHg <sup>‡</sup> | 67.3 ± 10.1              | 67.6 ± 9.7   | 68.6 ± 9.7   | 69.5 ± 10.0  |
| Hypertension, %                             | 55%                      | 57%          | 62%          | 65%          |
| Height, cm                                  | 163.4 ± 9.8              | 165.1 ± 10.0 | 166.0 ± 10.2 | 167.1 ± 10.0 |
| Waist, cm                                   | 94.6 ± 14.7              | 97.2 ± 12.6  | 102.0 ± 13.7 | 103.8 ± 14.5 |
| Body mass index, kg/m <sup>2</sup>          | 27.1 ± 5.4               | 27.9 ± 5.1   | 29.4 ± 5.3   | 30.1 ± 5.8   |
| Blood pressure medication use, %            | 49%                      | 51%          | 55%          | 60%          |
| Ever smoker, %                              | 51%                      | 51%          | 52%          | 56%          |
| Diabetes, %                                 | 16%                      | 17%          | 21%          | 25%          |
| Apnea-hypopnea index (AHI), events/hour     | 3.0 ± 5.2                | 7.7 ± 7.8    | 14.3 ± 10.0  | 34.0 ± 18.6  |
| AHI < 5 events/hour, %                      | 82%                      | 43%          | 12%          | 0.4%         |
| 5 ≤ AHI < 15 events/hour, %                 | 16%                      | 46%          | 51%          | 13.6%        |
| AHI ≥ 15 events/hour, %                     | 2%                       | 11%          | 37%          | 86%          |

Data presented as mean ± standard deviation for continuous variables and (%) for categorical variables

<sup>‡</sup>Exam 5 blood pressure measurements unadjusted for medication use

Table S4 Association of NREM and REM Odds Ratio Product with Systolic and Diastolic Blood Pressure

|                                | <b>% Change in systolic blood pressure (95% CI)*</b> | <b>p-value</b> | <b>% Change in diastolic blood pressure (95% CI)*</b> | <b>p-value</b> |
|--------------------------------|------------------------------------------------------|----------------|-------------------------------------------------------|----------------|
| <b>NREM Odds Ratio Product</b> |                                                      |                |                                                       |                |
| Unadjusted Model (n = 1,799)   | 0.5 (-0.3 to 1.3)                                    | 0.21           | 0.3 (-0.4 to 0.9)                                     | 0.38           |
| Model 1 (n = 1,765)            | 0.3 (-0.4 to 1.0)                                    | 0.42           | 0.3 (-0.3 to 0.9)                                     | 0.37           |
| Model 2 (n = 1,754)            | 0.3 (-0.5 to 1.0)                                    | 0.49           | 0.2 (-0.4 to 0.9)                                     | 0.50           |
| Model 3 (n = 1,754)            | 0.2 (-0.5 to 1.0)                                    | 0.51           | 0.2 (-0.4 to 0.8)                                     | 0.52           |
| <b>REM Odds Ratio Product</b>  |                                                      |                |                                                       |                |
| Unadjusted Model (n = 1,762)   | -0.7 (-1.4 to 0.1)                                   | 0.07           | -0.6 (-1.2 to 0.1)                                    | 0.08           |
| Model 1 (n = 1,728)            | -0.5 (-1.2 to 0.2)                                   | 0.16           | -0.5 (-1.2 to 0.1)                                    | 0.11           |
| Model 2 (n = 1,717)            | -0.5 (-1.2 to 0.2)                                   | 0.18           | -0.5 (-1.1 to 0.2)                                    | 0.13           |
| Model 3 (n = 1,713)            | -0.5 (-1.2 to 0.2)                                   | 0.18           | -0.5 (-1.1 to 0.1)                                    | 0.13           |

\*All results reported per standard deviation increment of natural log-transformed NREM and REM odds ratio product.

Model 1: Adjusted for age, sex, race/ethnicity, body mass index (kg/m<sup>2</sup>), smoking status, cigarette pack-years, alcohol use, periodic limb movement, education level

Model 2: Model 1 + hypoxic burden ((%·min)/hr)

Model 3: Model 2 + duty cycle

CI = confidence interval; REM = rapid eye movement; NREM = non-rapid eye movement

Table S5 Apnea-Hypopnea Index Stratified Analyses

|                                  | Systolic Blood Pressure        |         |                         | Diastolic Blood Pressure       |         |                         |
|----------------------------------|--------------------------------|---------|-------------------------|--------------------------------|---------|-------------------------|
|                                  | Mean % change in SBP (95% CI)* | p-value | p-value for interaction | Mean % change in DBP (95% CI)* | p-value | p-value for interaction |
| Total Odds Ratio Product         |                                |         | 0.10                    |                                |         | 0.26                    |
| 5<AHI (n = 611)                  | 0.9 (-0.4 to 2.1)              | 0.17    |                         | 0.6 (-0.5 to 1.7)              | 0.29    |                         |
| 5≤AHI<15 (n = 557)               | -0.9 (-2.1 to 0.4)             | 0.17    |                         | -0.5 (-1.6 to 0.6)             | 0.34    |                         |
| AHI≥15 (n = 597)                 | 0.7 (-0.6 to 1.9)              | 0.28    |                         | 0.6 (-0.5 to 1.7)              | 0.31    |                         |
| NREM Odds Ratio Product          |                                |         | 0.66                    |                                |         | 0.53                    |
| 5<AHI (n = 611)                  | 0.2 (-1.0 to 1.4)              | 0.75    |                         | 0.4 (-0.6 to 1.5)              | 0.44    |                         |
| 5≤AHI<15 (n = 557)               | -0.1 (-1.4 to 1.2)             | 0.86    |                         | -0.3 (-1.4 to 0.8)             | 0.57    |                         |
| AHI≥15 (n = 597)                 | 0.7 (-0.6 to 2.0)              | 0.28    |                         | 0.5 (-0.6 to 1.6)              | 0.38    |                         |
| REM Odds Ratio Product           |                                |         | 0.03                    |                                |         | 0.12                    |
| 5<AHI (n = 601)                  | -0.1 (-1.3 to 1.1)             | 0.90    |                         | -0.03 (-1.1 to 1.0)            | 0.96    |                         |
| 5≤AHI<15 (n = 553)               | -1.8 (-3.0 to -0.6)            | 0.003   |                         | -1.5 (-2.5 to -0.4)            | 0.008   |                         |
| AHI≥15 (n = 574)                 | 0.4 (-0.9 to 1.6)              | 0.58    |                         | -0.1 (-1.2 to 1.0)             | 0.81    |                         |
| NREM Inspiratory Flow Limitation |                                |         | 0.57                    |                                |         | 0.84                    |
| 5<AHI (n = 626)                  | -1.2 (-2.3 to -0.2)            | 0.02    |                         | -0.9 (-1.8 to 0.04)            | 0.06    |                         |
| 5≤AHI<15 (n = 599)               | -0.5 (-1.7 to 0.8)             | 0.45    |                         | -0.5 (-1.6 to 0.6)             | 0.33    |                         |
| AHI≥15 (n = 574)                 | -0.5 (-1.9 to 1.0)             | 0.50    |                         | -0.5 (-1.8 to 0.8)             | 0.42    |                         |
| REM Inspiratory Flow Limitation  |                                |         | 0.33                    |                                |         | 0.12                    |
| 5<AHI (n = 619)                  | -0.5 (-1.5 to 0.5)             | 0.34    |                         | -0.3 (-1.2 to 0.6)             | 0.52    |                         |
| 5≤AHI<15 (n = 571)               | -0.9 (-2.3 to 0.5)             | 0.20    |                         | -1.1 (-2.4 to 0.1)             | 0.08    |                         |
| AHI≥15 (n = 588)                 | 0.5 (-0.9 to 1.9)              | 0.47    |                         | 0.7 (-0.5 to 1.9)              | 0.26    |                         |
| NREM Duty Cycle                  |                                |         | 0.01                    |                                |         | 0.03                    |
| 5<AHI (n = 627)                  | -1.0 (-2.4 to 0.3)             | 0.12    |                         | -0.9 (-2.0 to 0.3)             | 0.15    |                         |
| 5≤AHI<15 (n = 577)               | -2.1 (-3.3 to -1.0)            | <0.001  |                         | -1.3 (-2.4 to -0.3)            | 0.01    |                         |
| AHI≥15 (n = 609)                 | 0.4 (-0.8 to 1.5)              | 0.55    |                         | 0.5 (-0.5 to 1.6)              | 0.30    |                         |
| REM Duty Cycle                   |                                |         | 0.007                   |                                |         | 0.02                    |
| 5<AHI (n = 619)                  | -0.9 (-2.4 to 0.5)             | 0.20    |                         | -0.2 (-1.5 to 1.0)             | 0.72    |                         |
| 5≤AHI<15 (n = 571)               | -2.2 (-3.4 to -1.0)            | <0.001  |                         | -1.3 (-2.3 to -0.2)            | 0.02    |                         |
| AHI≥15 (n = 588)                 | 0.4 (-0.7 to 1.5)              | 0.50    |                         | 0.8 (-0.2 to 1.8)              | 0.14    |                         |
| Overall Hypoxic Burden           |                                |         | 0.43                    |                                |         | 0.27                    |
| 5<AHI (n = 694)                  | 0.4 (-1.2 to 1.9)              | 0.65    |                         | 1.6 (0.2 to 2.9)               | 0.02    |                         |

|                        |                    |       |      |                    |      |      |
|------------------------|--------------------|-------|------|--------------------|------|------|
| 5 ≤ AHI < 15 (n = 641) | 1.6 (-1.2 to 4.4)  | 0.27  |      | 1.1 (-1.3 to 3.6)  | 0.37 |      |
| AHI ≥ 15 (n = 678)     | -0.7 (-2.8 to 1.4) | 0.51  |      | -0.3 (-2.2 to 1.6) | 0.73 |      |
| NREM Hypoxic Burden    |                    |       | 0.75 |                    |      | 0.57 |
| 5 < AHI (n = 685)      | 0.2 (-1.4 to 1.8)  | 0.81  |      | 1.4 (-0.02 to 2.8) | 0.06 |      |
| 5 ≤ AHI < 15 (n = 640) | -0.3 (-2.5 to 1.9) | 0.76  |      | 0.1 (-1.9 to 2.1)  | 0.92 |      |
| AHI ≥ 15 (n = 677)     | 0.9 (-1.3 to 3.1)  | 0.45  |      | 0.7 (-1.2 to 2.7)  | 0.47 |      |
| REM Hypoxic Burden     |                    |       | 0.03 |                    |      | 0.11 |
| 5 < AHI (n = 676)      | 0.4 (-0.9 to 1.8)  | 0.56  |      | 1.1 (-0.1 to 2.3)  | 0.08 |      |
| 5 ≤ AHI < 15 (n = 630) | 2.2 (0.6 to 3.9)   | 0.007 |      | 0.8 (-0.6 to 2.2)  | 0.29 |      |
| AHI ≥ 15 (n = 651)     | -0.8 (-2.3 to 0.8) | 0.31  |      | -0.8 (-2.1 to 0.6) | 0.26 |      |

All models adjusted for age, sex, race/ethnicity, smoking status, cigarette pack-years, body mass index (kg/m<sup>2</sup>), alcohol use, periodic limb movement, education level. Inspiratory flow limitation models also adjusted for % of time spent in slow wave sleep.

CI = confidence interval; REM = rapid eye movement; NREM = non-rapid eye movement; SBP = systolic blood pressure (mm Hg); DBP = diastolic blood pressure (mm Hg); AHI = apnea hypopnea index (events/hour)

\*Adjusted mean percent increment in blood pressure per 1-standard deviation increment of natural log-transformed sleep exposure variable.

Table S6 Smoking Stratified Analyses

|                                  | Systolic Blood Pressure        |         |                         | Diastolic Blood Pressure       |         |                         |
|----------------------------------|--------------------------------|---------|-------------------------|--------------------------------|---------|-------------------------|
|                                  | Mean % change in SBP (95% CI)* | p-value | p-value for interaction | Mean % change in DBP (95% CI)* | p-value | p-value for interaction |
| Total Odds Ratio Product         |                                |         | 0.81                    |                                |         | 0.07                    |
| Ever smoker (n = 943)            | 0.4 (-0.6 to 1.3)              | 0.48    |                         | -0.2 (-1.1 to 0.6)             | 0.48    |                         |
| Never smoker (n = 854)           | 0.2 (-0.8 to 1.2)              | 0.73    |                         | 0.9 (-0.03 to 1.8)             | 0.08    |                         |
| NREM Odds Ratio Product          |                                |         | 0.61                    |                                |         | 0.10                    |
| Ever smoker (n = 943)            | 0.5 (-0.4 to 1.5)              | 0.30    |                         | -0.2 (-1.0 to 0.7)             | 0.69    |                         |
| Never smoker (n = 854)           | 0.2 (-0.6 to 1.2)              | 0.77    |                         | 0.9 (-0.1 to 1.8)              | 0.06    |                         |
| REM Odds Ratio Product           |                                |         | 0.66                    |                                |         | 0.06                    |
| Ever smoker (n = 928)            | -0.6 (-1.6 to 0.3)             | 0.19    |                         | -1.1 (-1.9 to -0.2)            | 0.01    |                         |
| Never smoker (n = 832)           | -0.3 (-1.4 to 0.7)             | 0.55    |                         | 0.1 (-0.8 to 1.1)              | 0.79    |                         |
| NREM Inspiratory Flow Limitation |                                |         | 0.92                    |                                |         | 0.47                    |
| Ever smoker (n = 965)            | -0.8 (-1.7 to 0.2)             | 0.11    |                         | -0.4 (-1.2 to 0.5)             | 0.40    |                         |
| Never smoker (n = 866)           | -0.7 (-1.7 to 0.3)             | 0.17    |                         | -0.8 (-1.7 to 0.1)             | 0.08    |                         |
| REM Inspiratory Flow Limitation  |                                |         | 0.73                    |                                |         | 0.79                    |
| Ever smoker (n = 954)            | -0.5 (-1.5 to 0.5)             | 0.31    |                         | -0.3 (-1.1 to 0.6)             | 0.52    |                         |
| Never smoker (n = 855)           | -0.3 (-1.3 to 0.7)             | 0.61    |                         | -0.1 (-1.0 to 0.8)             | 0.80    |                         |
| NREM Duty Cycle                  |                                |         | 0.06                    |                                |         | 0.007                   |
| Ever smoker (n = 973)            | -0.2 (-1.2 to 0.7)             | 0.60    |                         | 0.3 (-0.5 to 1.1)              | 0.51    |                         |
| Never smoker (n = 872)           | -1.6 (-2.6 to -0.5)            | 0.004   |                         | -1.4 (-2.3 to -0.5)            | 0.003   |                         |
| REM Duty Cycle                   |                                |         | 0.03                    |                                |         | 0.01                    |
| Ever smoker (n = 954)            | -0.1 (-1.1 to 0.8)             | 0.80    |                         | 0.5 (-0.3 to 1.4)              | 0.23    |                         |
| Never smoker (n = 855)           | -1.7 (-2.7 to -0.6)            | 0.002   |                         | -1.2 (-2.1 to -0.3)            | 0.01    |                         |
| Overall Hypoxic Burden           |                                |         | 0.25                    |                                |         | 0.13                    |
| Ever smoker (n = 1,084)          | 0.1 (-0.9 to 1.1)              | 0.89    |                         | 0.5 (-0.4 to 1.4)              | 0.24    |                         |
| Never smoker (n = 961)           | 0.8 (-0.2 to 1.8)              | 0.10    |                         | 1.4 (0.5 to 2.3)               | 0.001   |                         |
| NREM Hypoxic Burden              |                                |         | 0.49                    |                                |         | 0.31                    |
| Ever smoker (n = 1,081)          | 0.1 (-0.8 to 1.1)              | 0.77    |                         | 0.6 (-0.2 to 1.5)              | 0.15    |                         |
| Never smoker (n = 953)           | 0.6 (-0.4 to 1.6)              | 0.25    |                         | 1.2 (0.3 to 2.1)               | 0.008   |                         |
| REM Hypoxic Burden               |                                |         | 0.11                    |                                |         | 0.02                    |
| Ever smoker (n = 1,055)          | 0.2 (-0.7 to 1.2)              | 0.65    |                         | 0.1 (-0.7 to 0.9)              | 0.80    |                         |
| Never smoker (n = 934)           | 1.3 (0.3 to 2.3)               | 0.01    |                         | 1.6 (0.7 to 2.5)               | <0.001  |                         |



All models adjusted for age, sex, race/ethnicity, body mass index ( $\text{kg}/\text{m}^2$ ), alcohol use, periodic limb movement, education level. Inspiratory flow limitation models also adjusted for % of time spent in slow wave sleep.

CI = confidence interval; REM = rapid eye movement; NREM = non-rapid eye movement; SBP = systolic blood pressure (mm Hg); DBP = diastolic blood pressure (mm Hg)

\*Adjusted mean percent increment in blood pressure per 1-standard deviation increment of natural log-transformed sleep exposure variable.

Table S7 Hypertension Medication Stratified Analyses

|                                  | Systolic Blood Pressure        |         |                         | Diastolic Blood Pressure       |         |                         |
|----------------------------------|--------------------------------|---------|-------------------------|--------------------------------|---------|-------------------------|
|                                  | Mean % change in SBP (95% CI)* | p-value | p-value for interaction | Mean % change in DBP (95% CI)* | p-value | p-value for interaction |
| Total Odds Ratio Product         |                                |         | 0.62                    |                                |         | 0.54                    |
| Non-user (n=826)                 | 0.4 (-0.6 to 1.4)              | 0.44    |                         | 0.5 (-0.5 to 1.4)              | 0.33    |                         |
| Anti-hypertensive user (n=939)   | 0.1 (-0.9 to 1.0)              | 0.92    |                         | 0.1 (-0.8 to 0.9)              | 0.88    |                         |
| NREM Odds Ratio Product          |                                |         | 0.94                    |                                |         | 0.54                    |
| Non-user (n=826)                 | 0.2 (-0.8 to 1.2)              | 0.69    |                         | 0.1 (-0.9 to 1.0)              | 0.91    |                         |
| Anti-hypertensive user (n=939)   | 0.3 (-0.7 to 1.2)              | 0.58    |                         | 0.5 (-0.4 to 1.3)              | 0.30    |                         |
| REM Odds Ratio Product           |                                |         | 0.21                    |                                |         | 0.15                    |
| Non-user (n=811)                 | -0.7 (-1.8 to 0.3)             | 0.16    |                         | -0.9 (-1.8 to 0.1)             | 0.07    |                         |
| Anti-hypertensive user (n=917)   | 0.1 (-0.8 to 1.1)              | 0.77    |                         | 0.1 (-0.8 to 0.9)              | 0.88    |                         |
| NREM Inspiratory Flow Limitation |                                |         | 0.24                    |                                |         | 0.11                    |
| Non-user (n=841)                 | -1.0 (-2.1 to 0.1)             | 0.07    |                         | -1.1 (-2.0 to -0.1)            | 0.04    |                         |
| Anti-hypertensive user (n=958)   | -0.2 (-1.1 to 0.7)             | 0.72    |                         | -0.01 (-0.8 to 0.8)            | 0.97    |                         |
| REM Inspiratory Flow Limitation  |                                |         | 0.07                    |                                |         | 0.18                    |
| Non-user (n=831)                 | -0.9 (-1.9 to 0.2)             | 0.11    |                         | -0.6 (-1.5 to 0.4)             | 0.25    |                         |
| Anti-hypertensive user (n=947)   | 0.4 (-0.5 to 1.4)              | 0.38    |                         | 0.3 (-0.5 to 1.1)              | 0.48    |                         |
| NREM Duty Cycle                  |                                |         | 0.44                    |                                |         | 0.06                    |
| Non-user (n=843)                 | -1.1 (-2.2 to -0.1)            | 0.04    |                         | -1.1 (-2.1 to -0.2)            | 0.02    |                         |
| Anti-hypertensive user (n=970)   | 13.1 (-18.8 to 57.5)           | 0.48    |                         | 0.1 (-0.8 to 0.9)              | 0.87    |                         |
| REM Duty Cycle                   |                                |         | 0.23                    |                                |         | 0.11                    |
| Non-user (n=831)                 | -1.2 (-2.2 to -0.2)            | 0.02    |                         | -0.8 (-1.7 to 0.2)             | 0.11    |                         |
| Anti-hypertensive user (n=947)   | -0.3 (-1.3 to 0.6)             | 0.47    |                         | 0.3 (-0.6 to 1.1)              | 0.54    |                         |
| Overall Hypoxic Burden           |                                |         | 0.03                    |                                |         | <0.001                  |
| Non-user (n=932)                 | 1.1 (0.1 to 2.1)               | 0.03    |                         | 1.9 (1.0 to 2.8)               | <0.001  |                         |
| Anti-hypertensive user (n=1,081) | -0.4 (-1.3 to 0.6)             | 0.43    |                         | -0.1 (-0.9 to 0.8)             | 0.88    |                         |
| NREM Hypoxic Burden              |                                |         | 0.03                    |                                |         | 0.002                   |
| Non-user (n=925)                 | 1.1 (0.1 to 2.2)               | 0.03    |                         | 1.9 (1.0 to 2.9)               | <0.001  |                         |
| Anti-hypertensive user (n=1,077) | -0.3 (-1.2 to 0.6)             | 0.53    |                         | 0.01 (-0.8 to 0.9)             | 0.98    |                         |
| REM Hypoxic Burden               |                                |         | 0.23                    |                                |         | 0.04                    |
| Non-user (n=910)                 | 1.1 (0.1 to 2.1)               | 0.03    |                         | 1.4 (0.5 to 2.3)               | 0.002   |                         |
| Anti-hypertensive user (n=1,047) | 0.3 (-0.7 to 1.2)              | 0.58    |                         | 0.2 (-0.7 to 1.0)              | 0.71    |                         |

All models adjusted for age, race/ethnicity, smoking status, cigarette pack-years, body mass index (kg/m<sup>2</sup>), alcohol use, periodic limb movement, education level. Inspiratory flow limitation models also adjusted for % of time spent in slow wave sleep.

CI = confidence interval; REM = rapid eye movement; NREM = non-rapid eye movement; SBP = systolic blood pressure (mm Hg); DBP = diastolic blood pressure (mm Hg)

\*All results reported % increase in blood pressure per 1-standard deviation increment in natural-log transformed sleep exposure variable.

Figure S1. Directed acyclic graph describing potential association between odds ratio product and blood pressure. (dagitty.net/mMUJ288)

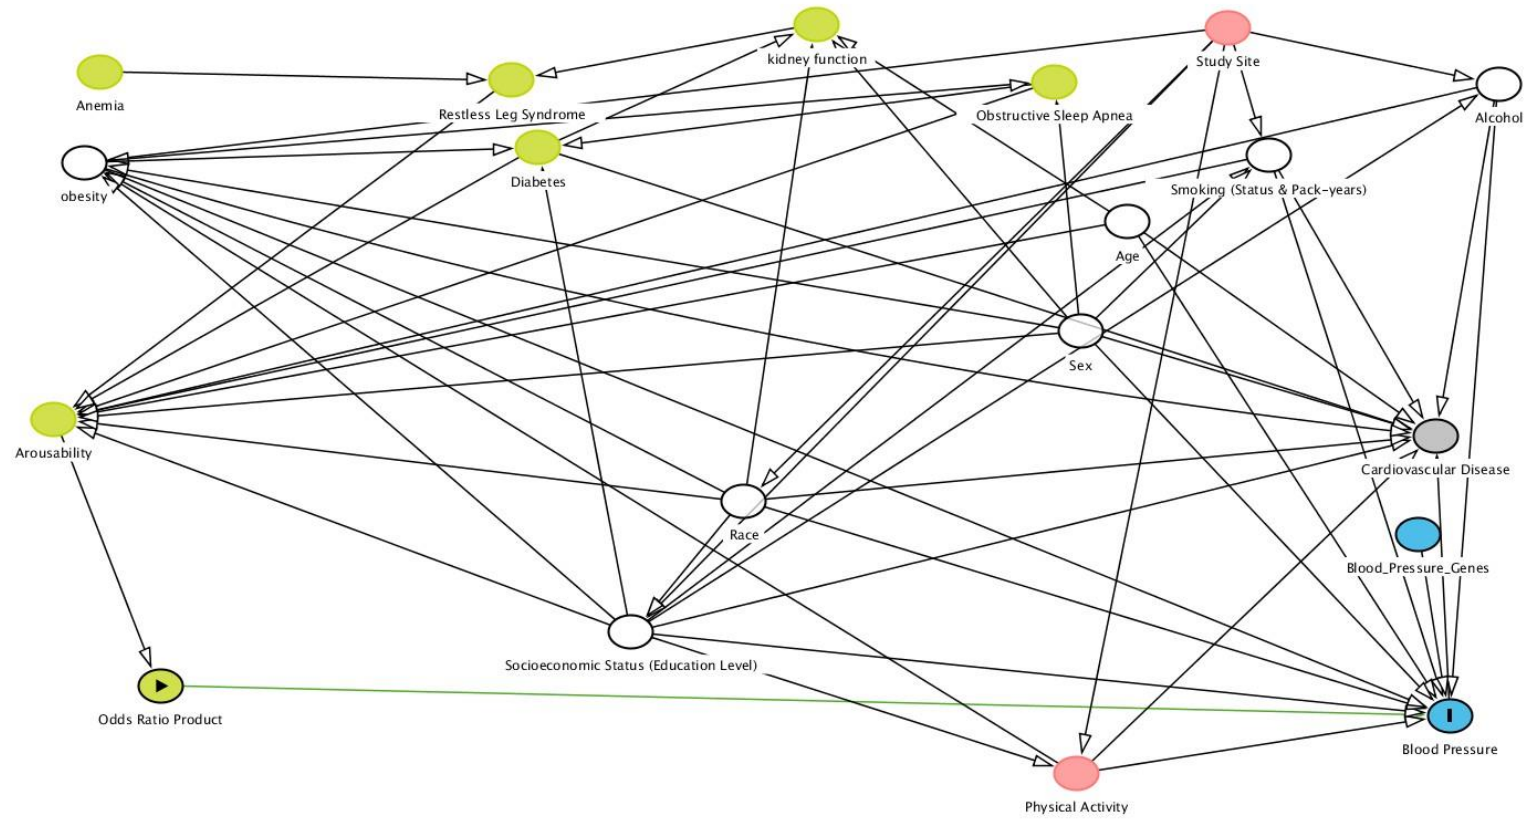

Figure S2. Flow chart of MESA Sleep study population and sleep exposures measured.

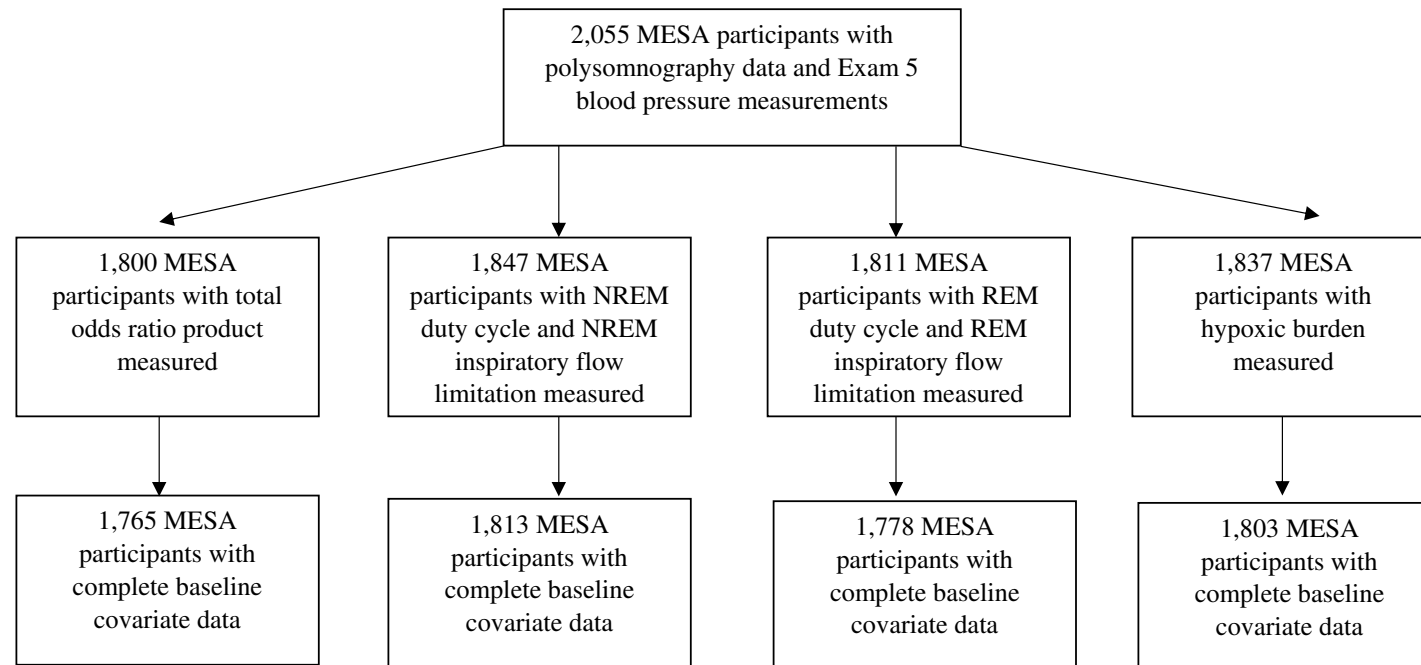

Supplement: NIHMS1742792-supplement-Supplement.pdf [file NIHMS1742792-supplement-Supplement.pdf]
